# Supplementary material for: Dynamic Growth and Shrinkage of the Salmonella-Containing Vacuole Determines the Intracellular Pathogen Niche
Source: PubMed Central journal article supplement — Cell Rep. 2019 Dec 17;29(12):3958–3973.e7. doi: 10.1016/j.celrep.2019.11.049 (PMC6931108; doi:10.1016/j.celrep.2019.11.049), 2019-12-17
Supplement: mmc1.pdf [file mmc1.pdf]

**Cell Reports, Volume 29**

**Supplemental Information**

**Dynamic Growth and Shrinkage**

**of the *Salmonella*-Containing Vacuole**

**Determines the Intracellular Pathogen Niche**

**Virginie Stévenin, Yuen-Yan Chang, Yoann Le Toquin, Magalie Duchateau, Quentin Gai Gianetto, Chak Hon Luk, Audrey Salles, Victoria Sohst, Mariette Matondo, Norbert Reiling, and Jost Enninga**

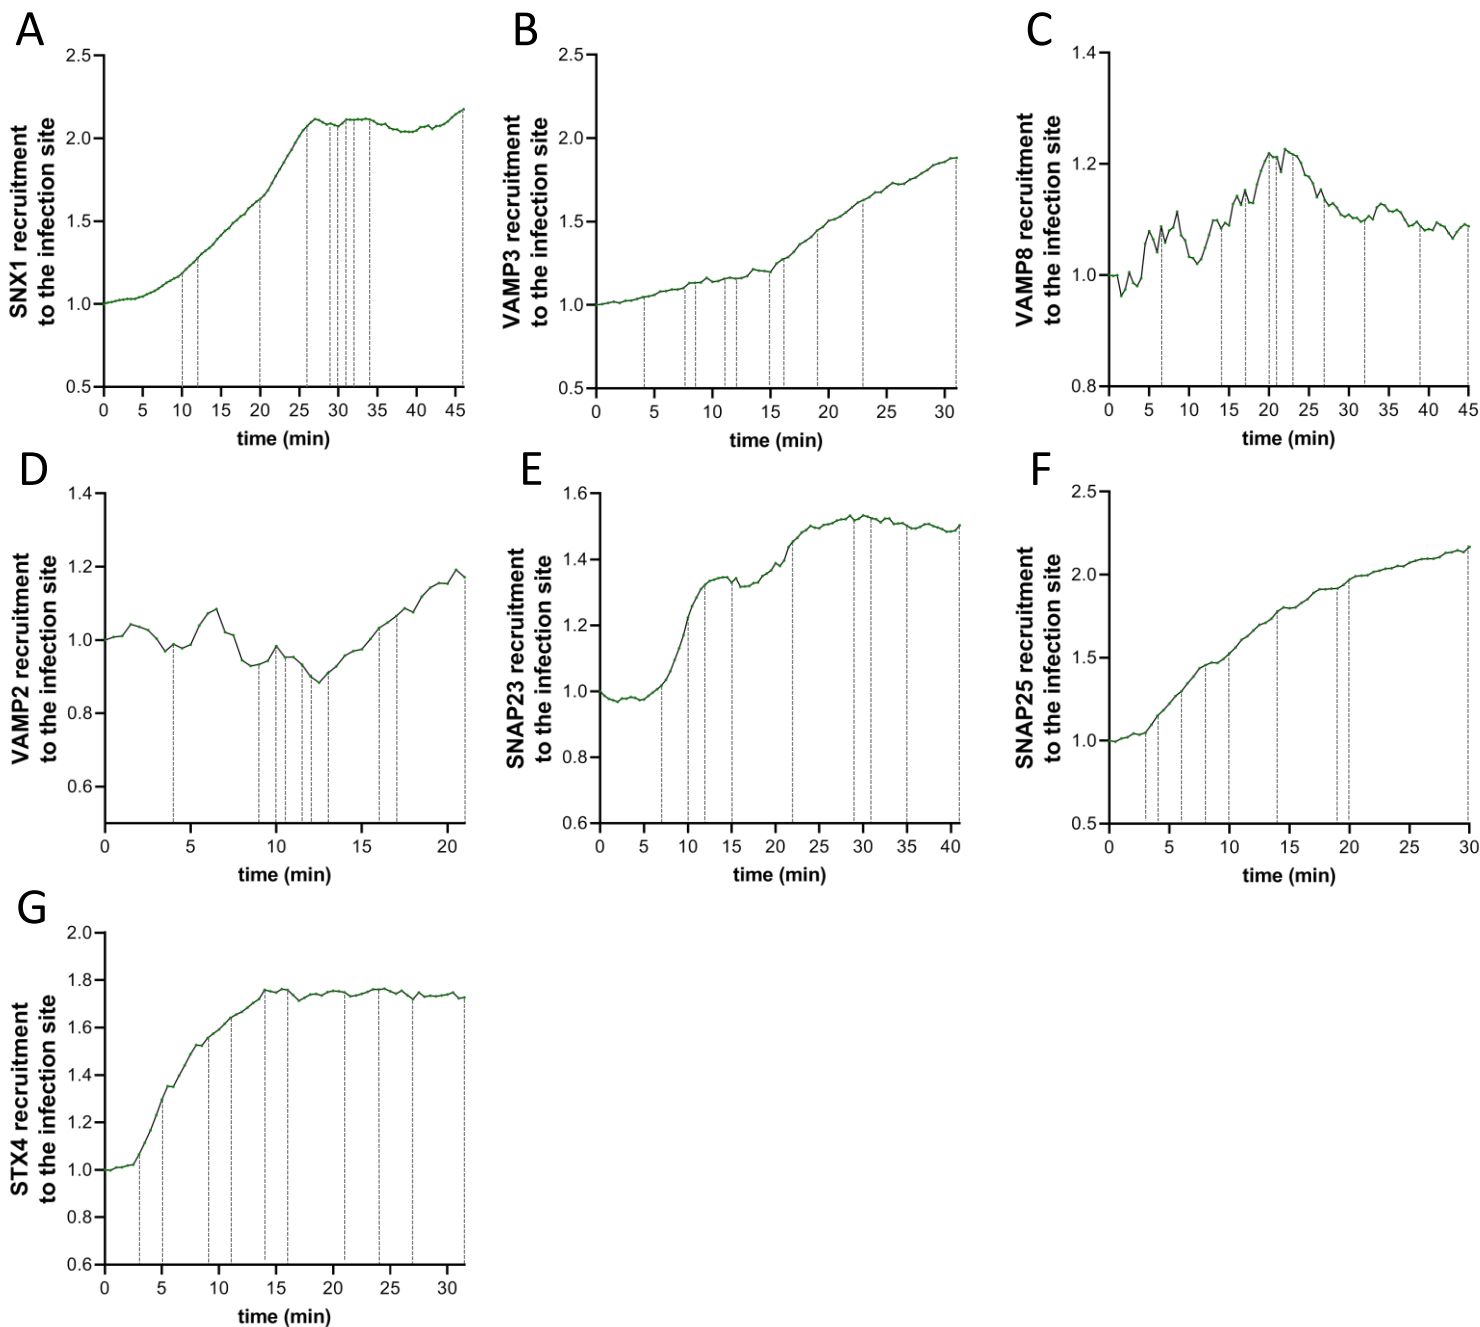

**Figure S1.** Quantification of the mean fluorescence intensity increases at the infection site over-time of the analyzed GFP-tagged proteins of interest. Infection sites are shown in the associated main Figures and Videos. Dashed lines correspond to time-point displayed in main Figures. The decrease of the overall fluorescence intensity due to photobleaching was corrected normalizing the values for each time-point with the fluorescence intensity outside of the site of interest. **A.** SNX1 recruitment to the infection site over time, related to Figure 1B and Video S1B. **B.** VAMP3 recruitment to the infection site over time, related to Figure 4A and Video S2A. **C.** VAMP8 recruitment to the infection site over time, related to Figure 4B and Video S2B. **D.** VAMP2 recruitment to the infection site over time, related to Figure 4C and Video S2C. **E.** SNAP23 recruitment to the infection site over time, related to Figure 4D and Video S2D. **F.** SNAP25 recruitment to the infection site over time, related to Figure 4E and Video S2E. **G.** STX4 recruitment to the infection site over time, related to Figure 6B and Video S4A.

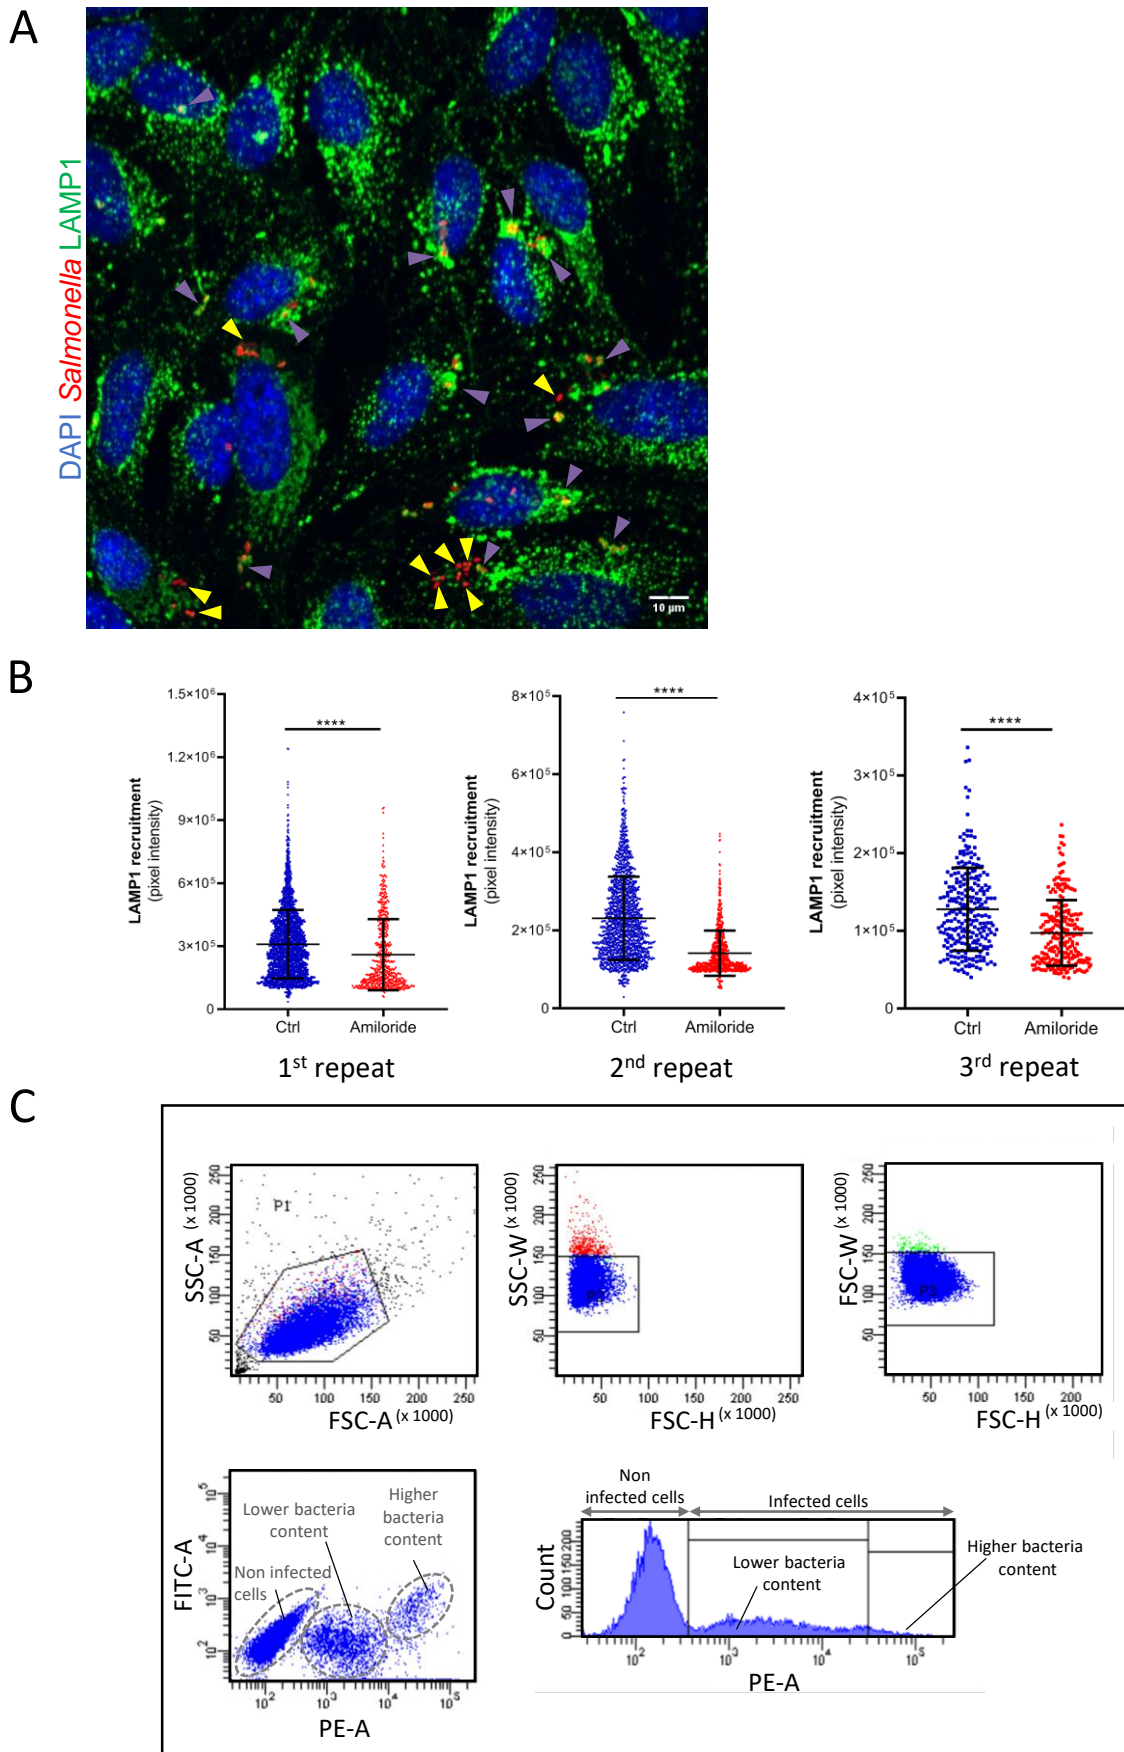

**Figure S2. A-B.** Related to Figure 2C. **A.** Confocal microscopy of HeLa cells infected with fluorescent *Salmonella* (in red) and fixed at 2 h pi. Samples were immunolabeled for LAMP1 (in green). Scale bars: 10  $\mu$ m. Yellow arrow: *Salmonella* not surrounded by a LAMP1 coat. Purple arrow: *Salmonella* surrounded by a LAMP1 coat. **B.** Quantification of LAMP1 recruitment around *Salmonella* at 2 h pi using the Imaris software tool for 3D image analysis as represented in A. Individual dots: mean pixel intensity in the LAMP1 channel at a given bacterial localization. The graphs represent measures over 10 fields of view per conditions in 3 independent experiments plotted individually. P-values were obtained after t-test. Error-bars: +/- SD. **C.** Quantification of HeLa cells

containing hyper-replicating salmonellae by flow cytometry, related to Figure 2E. Doublets were excluded using SSC/FSC gating. Fluorescence compensation was performed using the FITC and PE channels. The populations of non-infected cells and infected cells with a lower and higher number of intracellular bacteria were distinguished using the dsRed fluorescence intensity per cell (PE channel).

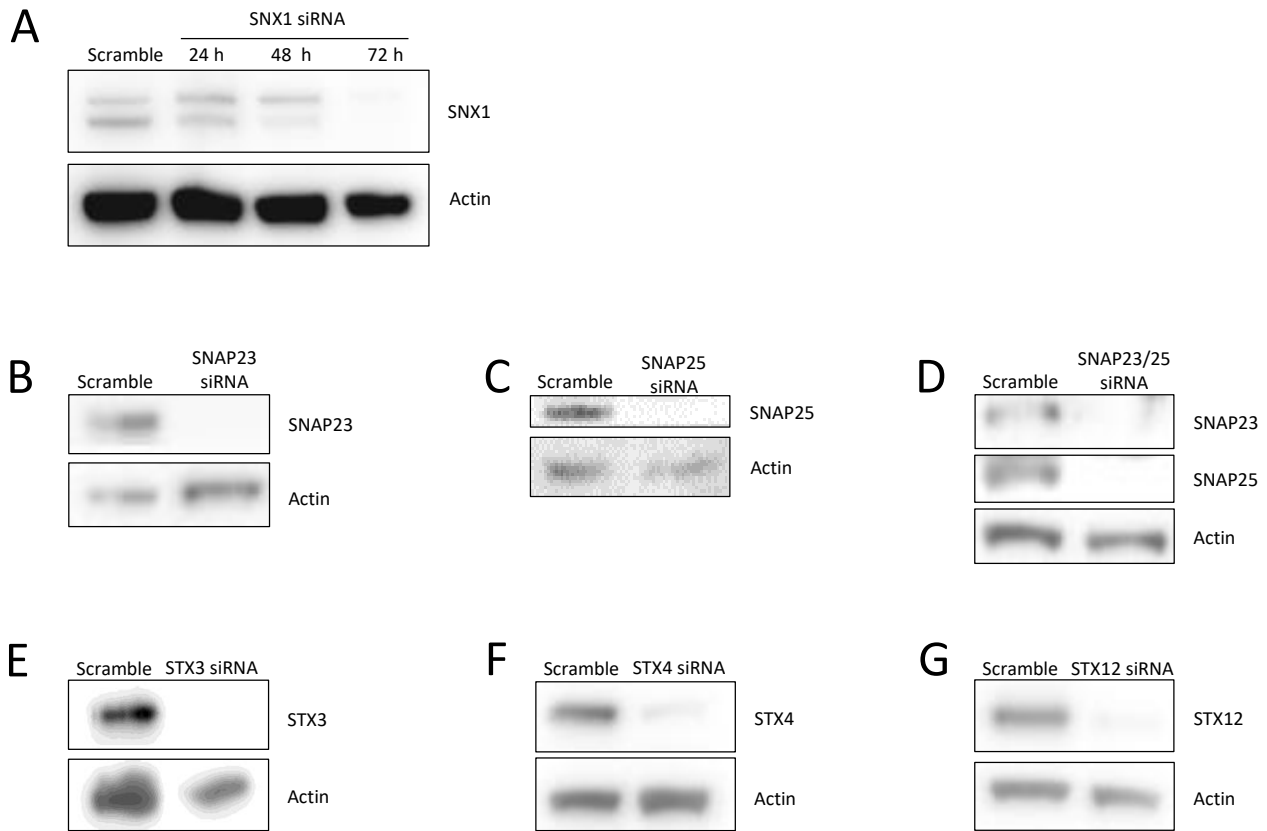

**Figure S3. A.** Knockdown efficiencies assessed by Western Blot of HeLa cells extract after 24, 48 and 72 h of SNX1 siRNA treatment, related to Figures 2F-G. **B-G** Knockdown efficiencies assessed by Western Blot of HeLa cells extract after 72 h of siRNA treatment. **B.** SNAP23 siRNA knockdown efficiency, related to Figure 5. **C.** SNAP25 siRNA knockdown efficiency, related to Figure 5. **D.** SNAP23 and SNAP25 double siRNA knockdown efficiency, related to Figure 5. **E.** STX3 siRNA knockdown efficiency, related to Figure 6A. **F.** STX4 siRNA knockdown efficiency, related to Figure 6. **G.** STX12 siRNA knockdown efficiency, related to Figure 6A.

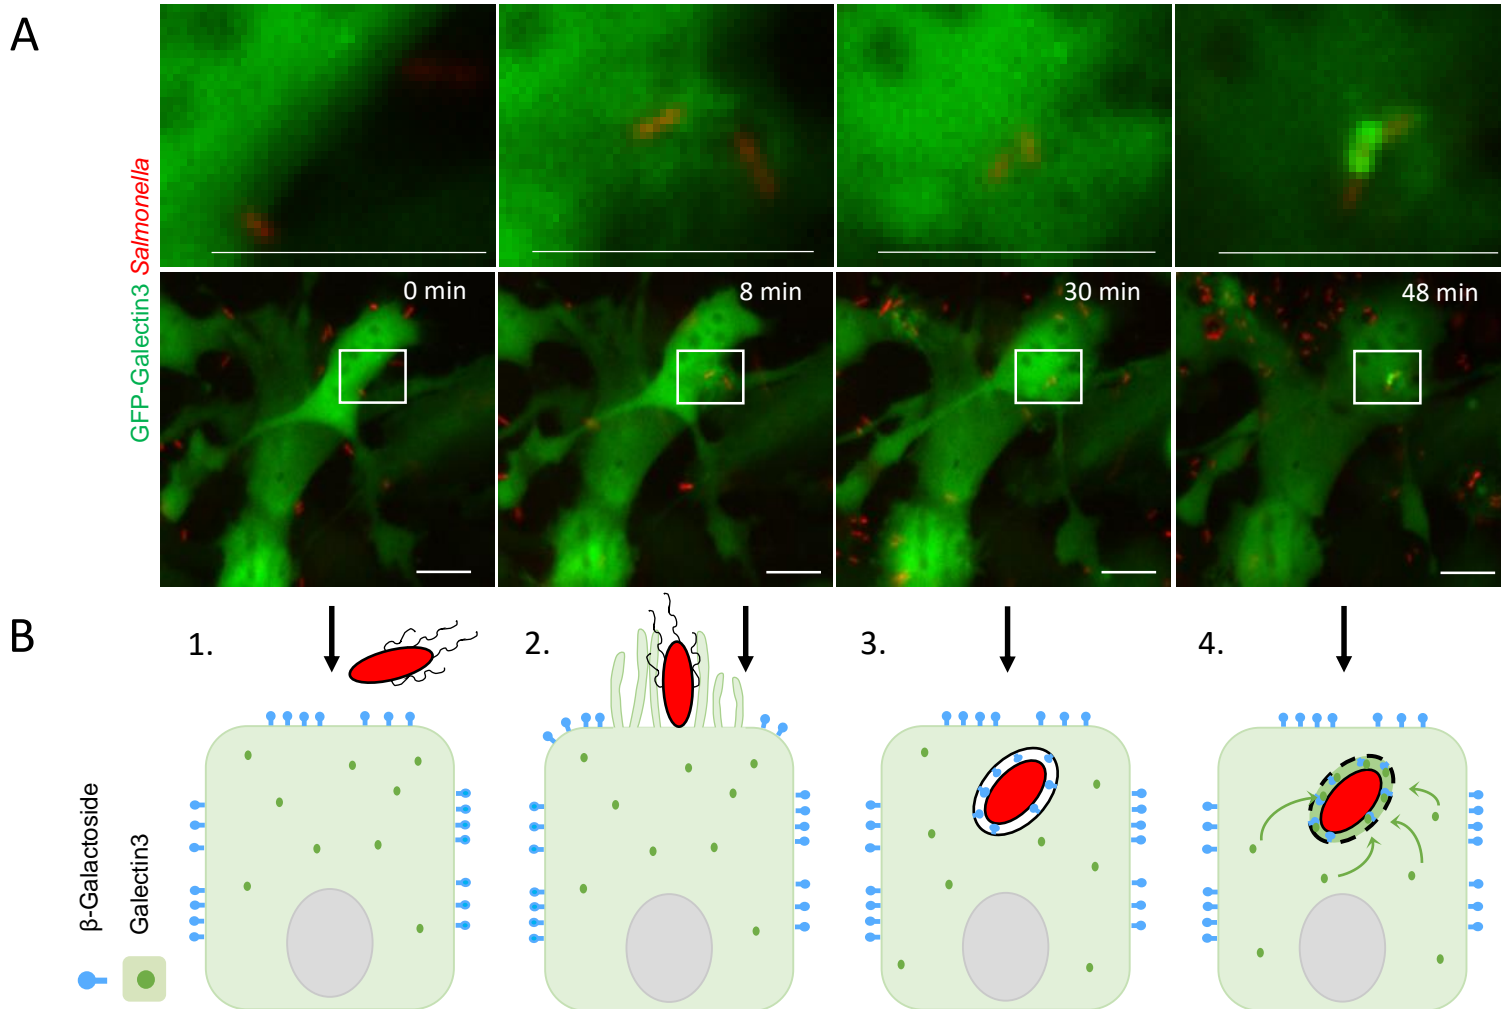

**Figure S4.** Related to Figures 2H and 5F, and Video S4E. Detection of SCV rupturing events using the fluorescent reporter GFP-Galectin3. **A.** Time-lapse of HeLa cells transfected with GFP-Galectin3 (in green) and infected with fluorescent *Salmonella* (in red). Scale bars: 5  $\mu\text{m}$ . **B.** Scheme of the Galectin3 recruitment at the ruptured SCV over time. Step 1: HeLa cells expressing cytosolic GFP-Galectin3 are incubated with fluorescent salmonellae.  $\beta$ -Galactoside is present on the outside layer of the plasma membrane. Step 2: *Salmonella* infects a given host cell, inducing ruffle formation. Step 3: The bacterium is engulfed in the SCV.  $\beta$ -Galactoside is present on the outside layer of the plasma membrane and the inner layer of the SCV membrane. Step 4: The SCV ruptures, allowing the access of Galectin3 to the  $\beta$ -Galactoside attached to the rupturing SCV membrane. The accumulation of Galectin3 on the damaged membrane leads to a local increase of the detected GFP fluorescence intensity.

A

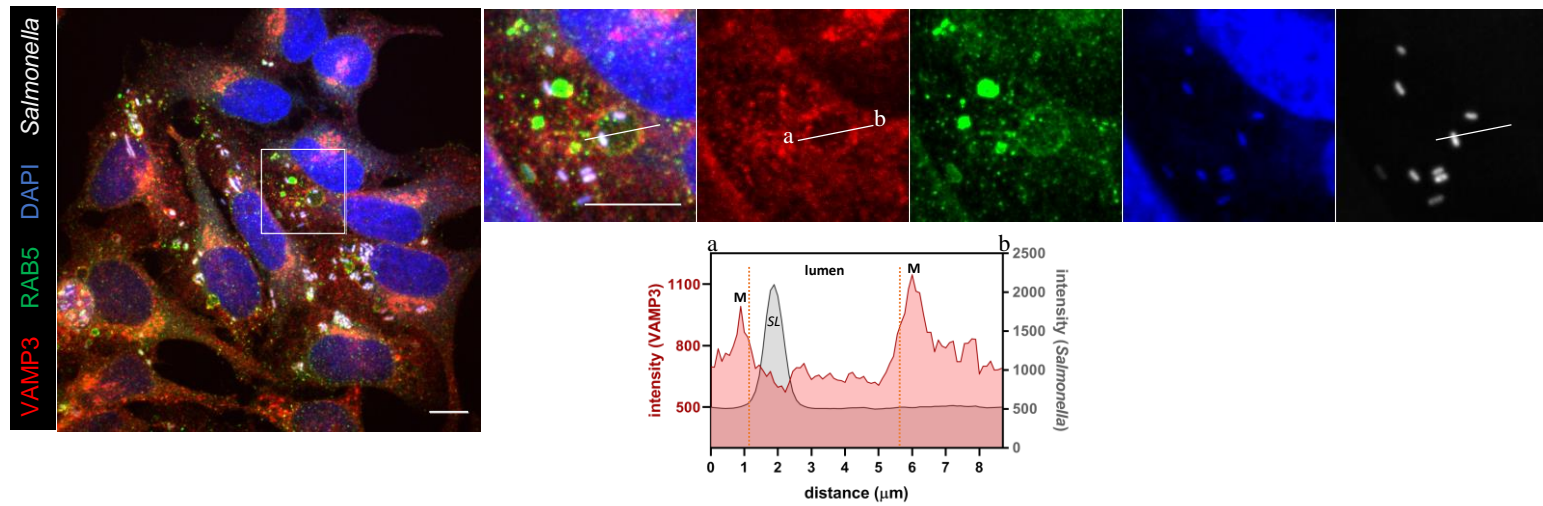

B

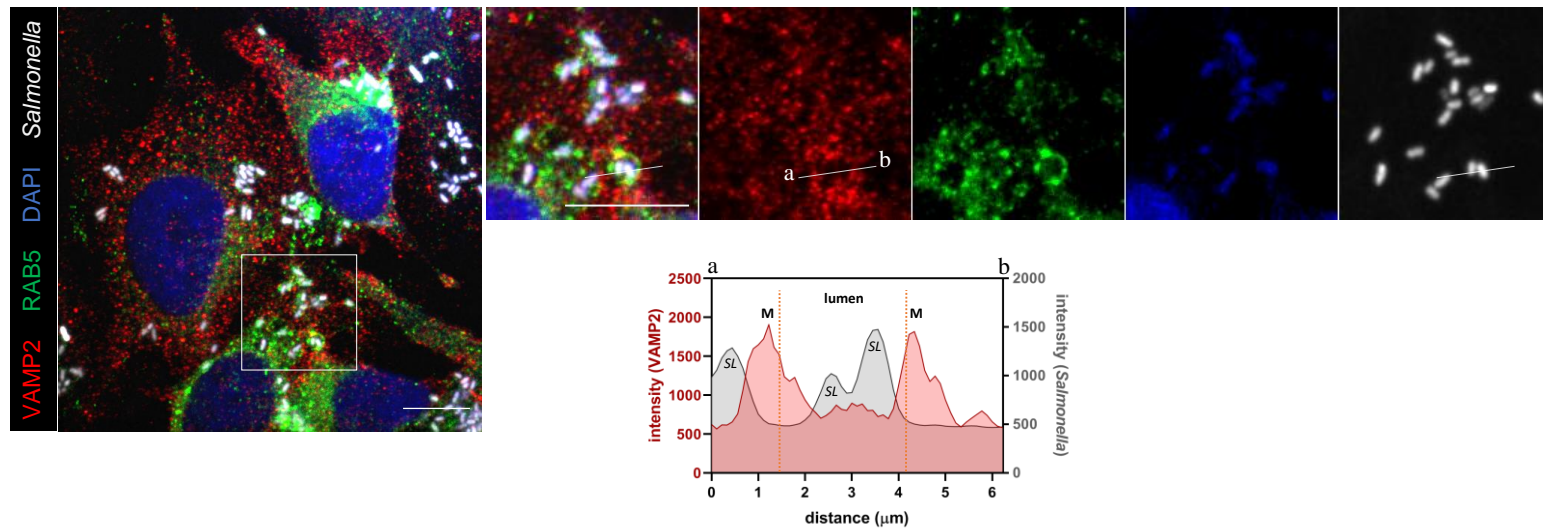

C

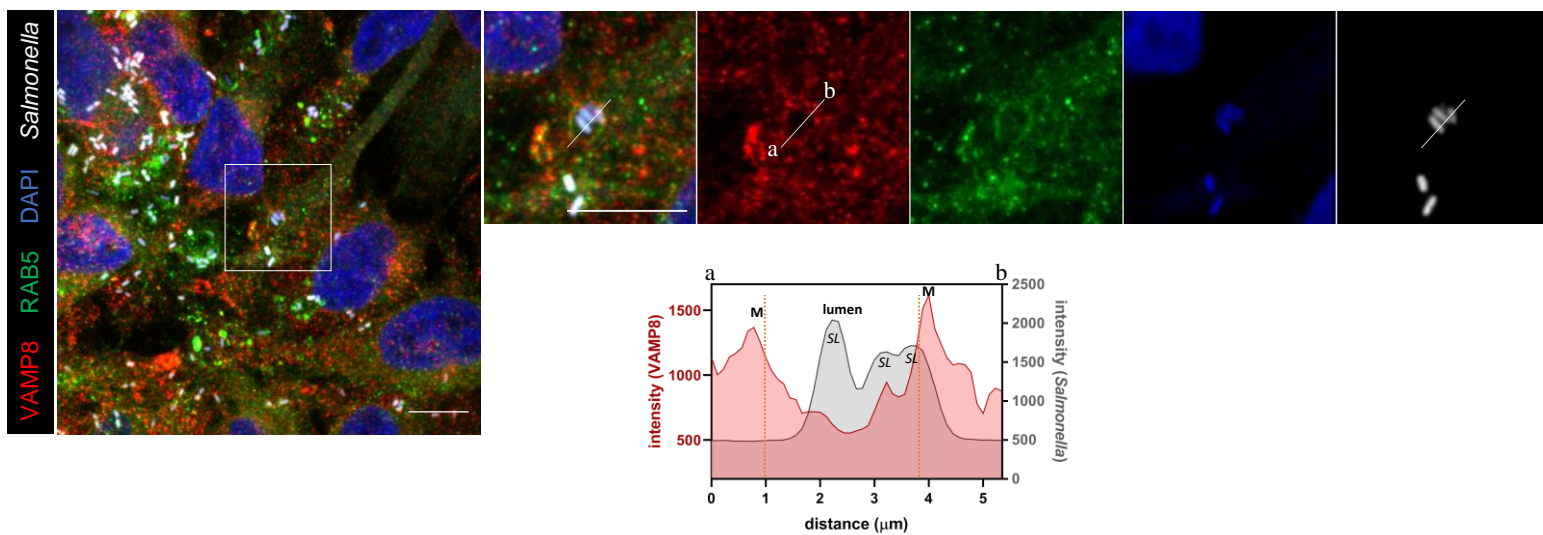

**Figure S5.** Confocal microscopy of a HeLa cell infected for 30 min with dsRed-expressing *Salmonella* (in white) before fixation and (immuno-)labeling with DAPI (in blue) and antibodies against RAB5 (in green) and VAMP proteins (in red). Graphs show the measured pixel intensities in the VAMP (red) and *Salmonella* (grey) channels along the white lines. "M" letters designate the localization of IAM membranes, "SL" designate the localization of salmonellae. **A.** VAMP3 localization by immunofluorescence, related to Figure 4A. **B.** VAMP2 localization by immunofluorescence, related to Figure 4C. **C.** VAMP8 localization by immunofluorescence, related to Figure 4B.

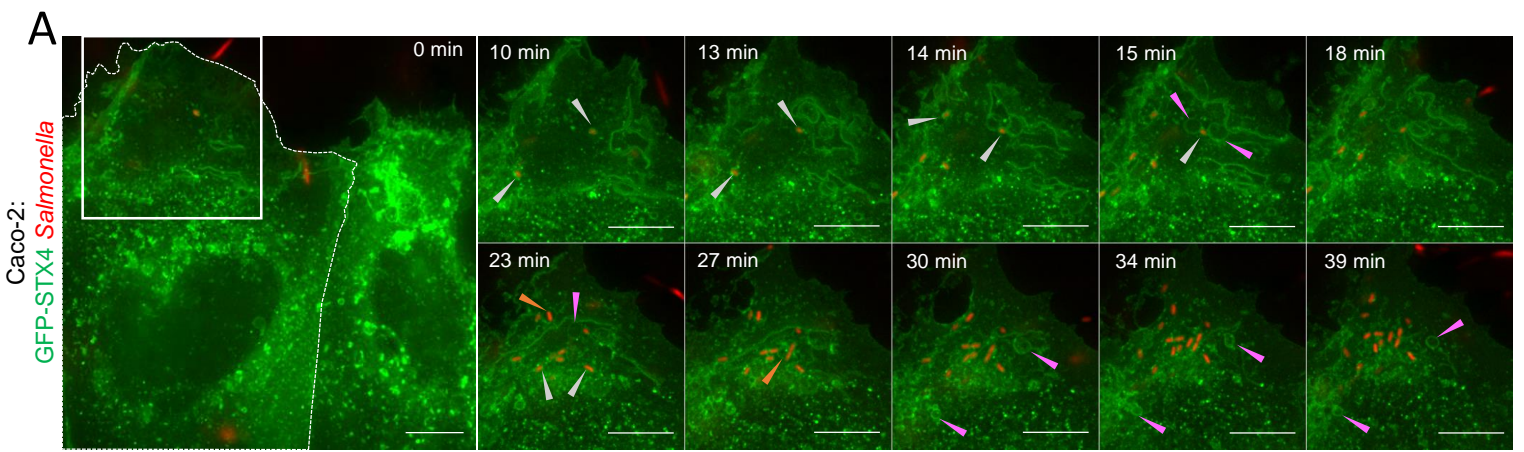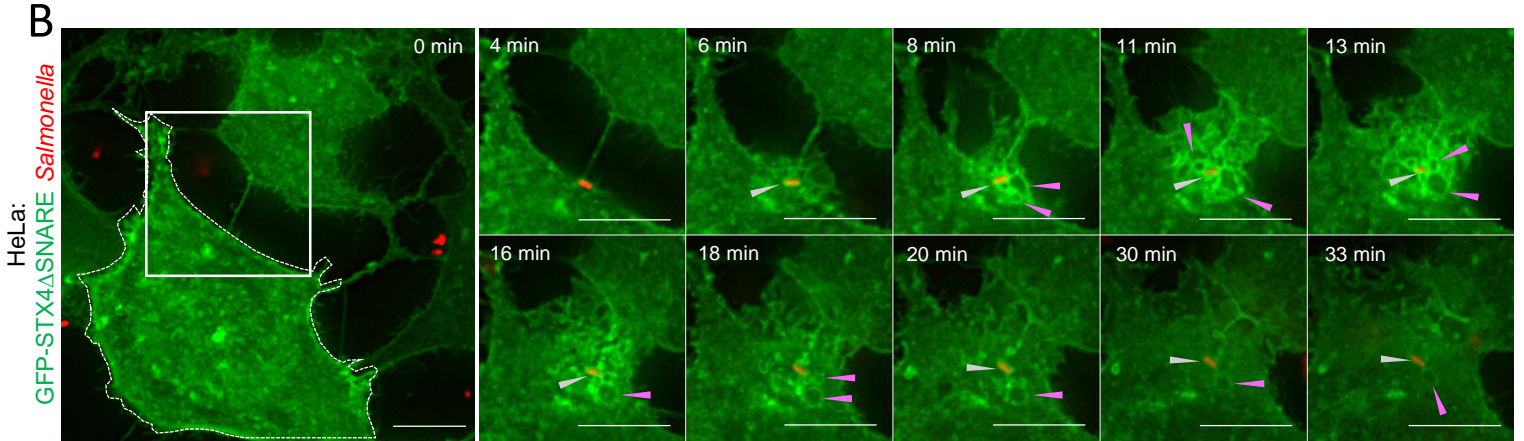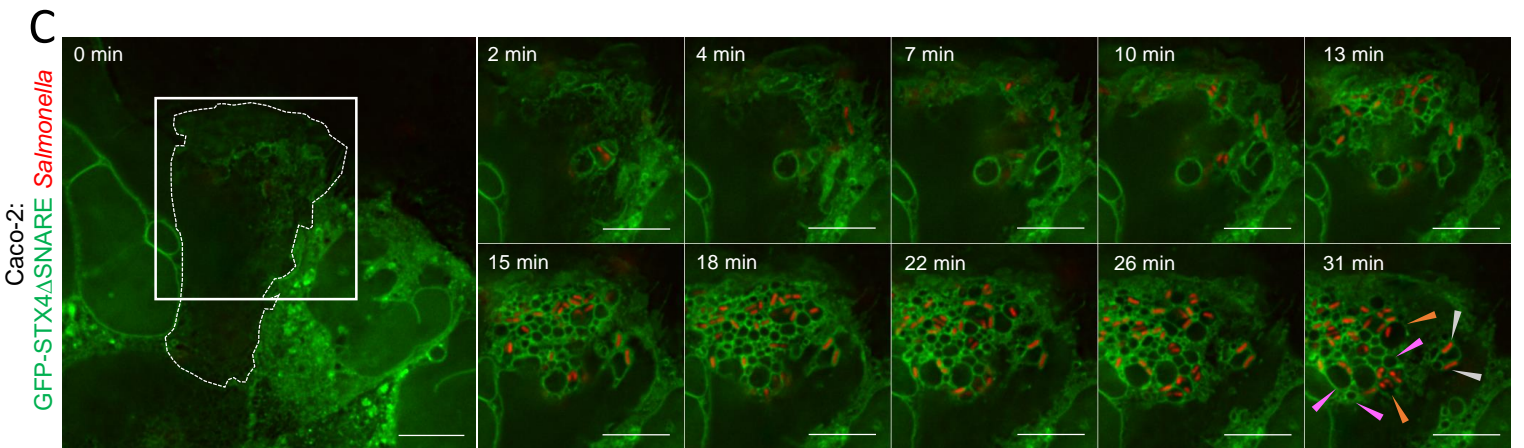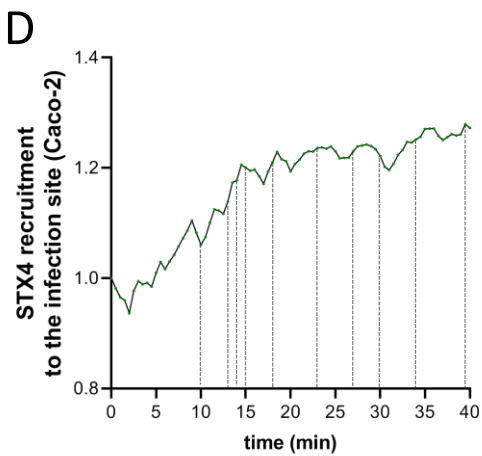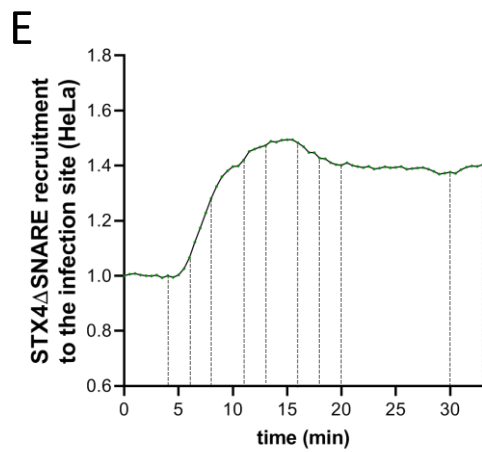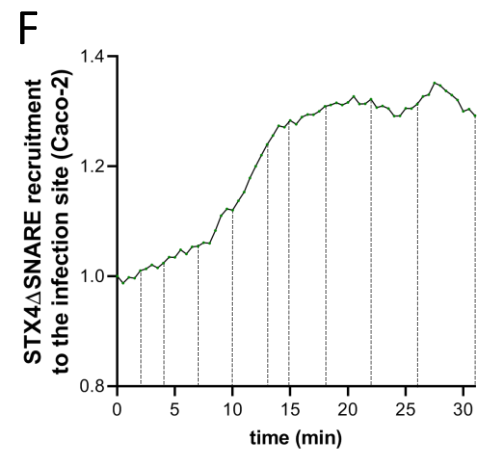

**Figure S6.** Related to Figure 6E. **A.** Time-lapse microscopy of Caco-2 cells transfected with GFP-tagged STX4 (in green) and infected with fluorescent *Salmonella* (in red). See also *Video S4C*. **B-C.** Time-lapse microscopy of



HeLa (**B**) and Caco-2 (**C**) cells transfected with GFP-STX4 $\Delta$ SNARE (in green) and infected with fluorescent *Salmonella* (in red). See also Video S4B&D. **A-C**. Scale bars: 10  $\mu$ m. Orange arrowheads designate large SCVs, pink arrowheads designate IAMs, white arrowheads designate tight SCVs. **D-F**. Quantification of the mean fluorescence intensity increases at the infection site over-time of GFP-tagged protein of interest. Infection sites are shown in the associated Figures and Movies. Dashed lines correspond to time-point displayed in the associated figures. The decrease of the overall fluorescence intensity due to photobleaching was corrected normalizing the values for each time-point by the fluorescence intensity outside of the site of interest. **D**. STX4 recruitment to the infection site of a Caco-2 cell over time, related to Figure S6A and Video S4C. **E**. STX4 $\Delta$ SNARE recruitment to the infection site of a HeLa cell over time, related to Figure S6B and Video S4B. **F**. STX4 $\Delta$ SNARE recruitment to the infection site of a Caco-2 cell over time, related to Figure S6C and Video S4D.
